# Supplementary material for: Mechanisms of Yersinia YopO kinase substrate specificity
Source: PubMed Central journal article supplement (PMC5209680; doi:10.1038/srep39998), 2017-01-04
Supplement: srep39998-s1.pdf [file srep39998-s1.pdf]

## SUPPLEMENTARY INFORMATION

### Mechanisms of *Yersinia* YopO kinase substrate specificity

*Wei Lin Lee, Pavithra Singaravelu, Sheena Wee, Bo Xue, Khay Chun Ang, Jayantha Gunaratne, Jonathan M Grimes, Kunchithapadam Swaminathan and Robert C Robinson*

|                                       |                        |
|---------------------------------------|------------------------|
| <b>Data collection</b>                |                        |
| Space group                           | P2 <sub>1</sub>        |
| Cell dimensions                       |                        |
| a, b, c (Å)                           | 108.73, 121.75, 118.58 |
| ( $\alpha$ , $\beta$ , $\gamma$ ) (°) | 90.0, 94.9, 90.0       |
| Resolution (Å)                        | 20.0-2.93 (2.97-2.93)  |
| R <sub>merge</sub>                    | 0.125 (0.778)          |
| I/ $\sigma$ (I)                       | 11.9 (2.7)             |
| Completeness (%)                      | 99.9 (99.8)            |
| Redundancy                            | 6.8 (6.6)              |
| <b>Refinement</b>                     |                        |
| Resolution (Å)                        | 2.93-14.69 (2.93-2.97) |
| No. reflections                       | 64,212                 |
| Rwork / Rfree                         | 19.6/24.0              |
| No. atoms                             |                        |
| Protein                               | 14992                  |
| Ligand/ion                            | 120                    |
| Water                                 | 9                      |
| B-factors overall (Å <sup>2</sup> )   | 75.56                  |
| Protein (Å <sup>2</sup> )             | 75.72                  |
| Ligand/ion (Å <sup>2</sup> )          | 56.03                  |
| Water (Å <sup>2</sup> )               | 57.93                  |
| R.m.s deviations                      |                        |
| Bond lengths (Å)                      | 0.006                  |
| Bond angles (°)                       | 1.272                  |

**Supplementary Table 1: Table of statistics associated with X-ray crystallographic analysis of the YopO-actin:MgADP complex.** Data collected from a single crystal. Values in parentheses are for the highest-resolution shell. The Rfree is calculated using 5% of the data.

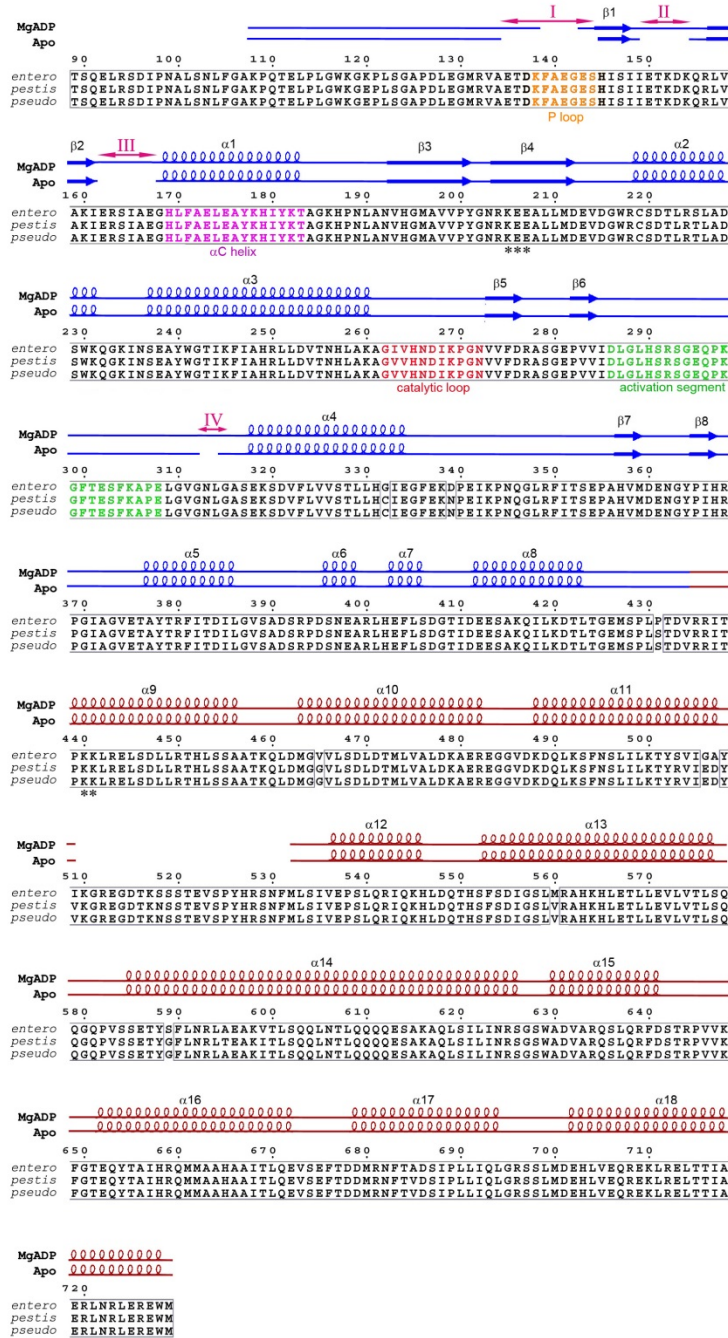

**Supplementary Figure 1: The secondary structure alignment of the apo (PDB: 4CI6) and MgADP bound structures of the YopO-actin complex shown alongside the sequence alignment of YopO from different species of *Yersinia*. *Entero*, *pestis* and *pseudo* denote *Y. enterocolitica* (Uniprot Q93KQ6-1), *Y. pestis* (Uniprot Q9RI12-1) and *Y. pseudotuberculosis* (Uniprot Q05608-1), respectively. Residues marked with solid blue and yellow squares are involved in the interaction with actin and Rac1, respectively. Residues marked with solid black and grey squares are involved in interactions with Mg<sup>2+</sup> and ADP, respectively. The regions that were disordered in the apo structure, but are ordered in the MgADP structure, are numbered and labeled with pink arrows.**

**a**

| Species                          | PDB  | Chain | Z    | rmsd | lali | nres | %id | Description                                   |
|----------------------------------|------|-------|------|------|------|------|-----|-----------------------------------------------|
| <i>Homo sapiens</i>              | 4ZY5 | A     | 23.5 | 2.6  | 244  | 281  | 16  | PAK1 in complex with an inhibitor compound 17 |
|                                  | 4QMX | A     | 23.4 | 2.8  | 250  | 288  | 17  | MST3 in complex with saracatinib              |
| <i>Mycobacteria tuberculosis</i> | 1MRU | A     | 20.4 | 2.8  | 228  | 322  | 17  | PknB in complex with ATP- $\gamma$ -S         |
|                                  | 4Y0X | A     | 19.4 | 2.9  | 237  | 322  | 18  | PknG in complex with ADP                      |

**b**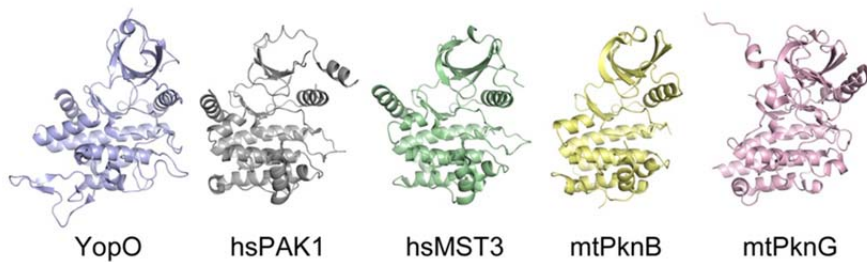**c**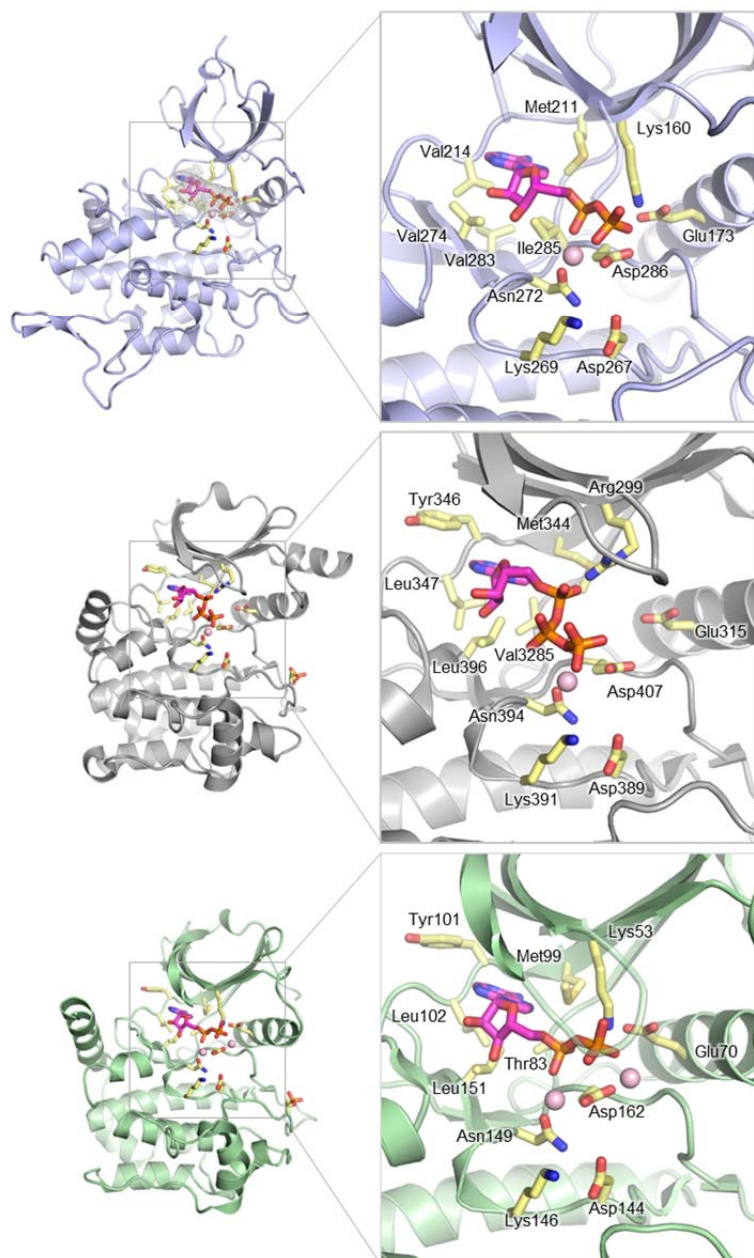

**Supplementary Figure 2: Identification of kinases structurally similar to YopO using Dali. (a)**

Table of structurally similar neighbours, showing two of each of the mammalian and bacterial kinases with the highest *Z* scores. *Z* score, the statistical significance of the similarity between the protein-of-interest and other neighbourhood proteins; rmsd, root mean square distance, root-mean-square deviation of C-alpha atoms in the least-squares superimposition of the structurally equivalent C-alpha atoms; lali, the number of structurally equivalent residues; nres, the total number of amino acids in the hit protein; %id, percentage of identical amino acids over structurally equivalent residues. (b) Visual comparison of structurally similar kinases. hs, *homo sapiens*; mt, *mycobacteria tuberculosis*. (c) Structural comparison of the catalytic clefts of YopO, PAK1 (PDB: 3Q53) and MST3 (PDB: 3A7J). The  $F_o-F_c$  electron density map at 3.0 Å resolution, contoured at 3.0  $\sigma$ , before MgADP was built is shown at the active site of the YopO kinase domain. ADP in YopO and MST3 and ATP in PAK1 are represented as sticks. Catalytic residues and residues that line the hydrophobic cleft are also represented as sticks. Mg (YopO and PAK1) and Mn (MST3) ions are shown as spheres (magenta).



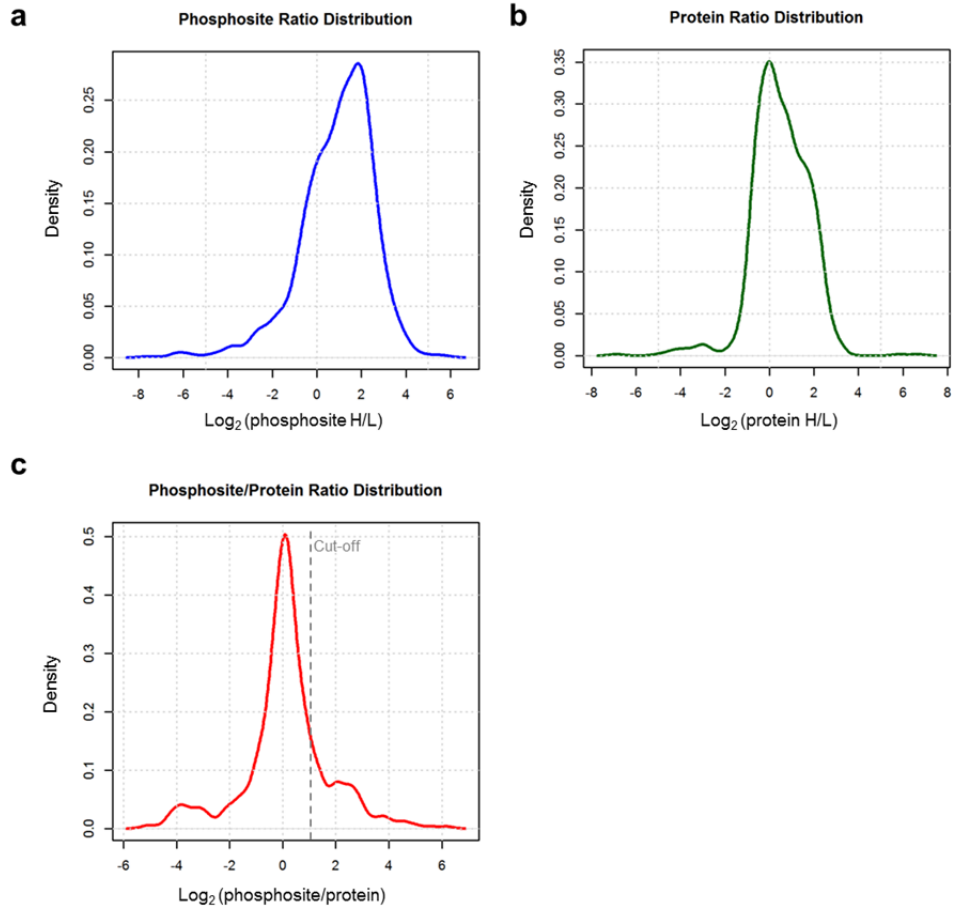

**Supplementary Figure 4: Distributions of quantified (a) phosphosites, (b) proteins and (c) the phosphosite/protein ratio.** Phosphorylation sites above the peptide/protein ratio of 2 (equivalent to the log<sub>2</sub> value of 1) were considered as putative YopO phosphorylation sites.

|                                  | Position (mouse)                               | Position (human)                               | Modified sequence                                                                                                                                    | Phosphosite H/L ratio normalized | Protein Ratio H/L normalized | Protein Ratio count | Phosphosite/protein ratio |
|----------------------------------|------------------------------------------------|------------------------------------------------|------------------------------------------------------------------------------------------------------------------------------------------------------|----------------------------------|------------------------------|---------------------|---------------------------|
| <b>Filament elongator</b>        |                                                |                                                |                                                                                                                                                      |                                  |                              |                     |                           |
| EVL                              | S335                                           | S337-p                                         | SNSVEKPV <sup>(ph)</sup> SLLSR                                                                                                                       | 31.57                            | 0.94                         | 14                  | 33.45                     |
|                                  | S356                                           | S358-p                                         | SPLQS <sup>(ph)</sup> QPHSR                                                                                                                          | 3.45                             | 0.94                         | 14                  | 3.65                      |
|                                  | S360                                           | S362-p                                         | SPLQSQPHS <sup>(ph)</sup> R                                                                                                                          | 3.70                             | 0.94                         | 14                  | 3.92                      |
| VASP                             | S2                                             | S2                                             | (ac)S <sup>(ph)</sup> ETVICSSR                                                                                                                       | 11.37                            | 0.83                         | 46                  | 13.76                     |
|                                  | S285-p                                         | S289-p                                         | ATQVGEKPPKDES <sup>(ph)</sup> ASEESEAR                                                                                                               | 1.88                             | 0.83                         | 46                  | 2.27                      |
|                                  | S317-p/<br>S318-p/<br>S319-p/<br>S320-p        | S322-p/<br>S323-p/<br>S324-p/<br>S325-p        | S <sup>(ph)</sup> <sup>#</sup> S <sup>(ph)</sup> <sup>#</sup> S <sup>(ph)</sup> <sup>#</sup> S <sup>(ph)</sup> <sup>#</sup> VTTSEAHPTPCSSDDSLER      | 1.67                             | 0.83                         | 46                  | 2.01                      |
| DIAPH1                           | S1214                                          | S1231                                          | AGCAVTS <sup>(ph)</sup> LLASELTK                                                                                                                     | 8.13                             | 0.62                         | 20                  | 13.14                     |
| INF2                             | S1186                                          | S1158-p                                        | TEADSTSEGPEDEAQRGQS <sup>(ph)</sup> THLPR                                                                                                            | 3.54                             | 0.54                         | 9                   | 6.53                      |
| SHOT1                            | S249-p                                         | S249-p                                         | RQS <sup>(ph)</sup> HLLQSSLPDQQLLK                                                                                                                   | 11.43                            | 1.09                         | 4                   | 10.51                     |
| <b>Actin turnover protein</b>    |                                                |                                                |                                                                                                                                                      |                                  |                              |                     |                           |
| CAP1                             | S254-p                                         | S255-p                                         | S <sup>(ph)</sup> ALFAQINQGESITHALK                                                                                                                  | 12.14                            | 1.53                         | 57                  | 7.93                      |
|                                  | S22/ T24/<br>S25                               | S22/ T24/<br>S25-p                             | LEAVS <sup>(ph)</sup> <sup>#</sup> HT <sup>(ph)</sup> <sup>#</sup> S <sup>(ph)</sup> <sup>#</sup> DMHCGYGDSPSK                                       | 7.76                             | 1.53                         | 57                  | 5.07                      |
| <b>Signalling adaptor</b>        |                                                |                                                |                                                                                                                                                      |                                  |                              |                     |                           |
| ABI1                             | S183-p                                         | S183-p                                         | TNPPTQKPPS <sup>(ph)</sup> PPVSGR                                                                                                                    | 3.45                             | 1.65                         | 8                   | 2.10                      |
| EPS8                             | S57                                            | S57-p                                          | DSVS <sup>(ph)</sup> SVSDVSQYR                                                                                                                       | 8.57                             | 3.35                         | 11                  | 2.56                      |
| FNBP1L (TOCA1)                   | S488-p /<br>S489-p<br>and<br>T496-p<br>/S501-p | S488-p /<br>S489-p<br>and<br>T496-p<br>/S501-p | RHS <sup>(ph)</sup> <sup>#</sup> S <sup>(ph)</sup> <sup>#</sup> DINHLVT <sup>(ph)</sup> <sup>#</sup> QGRES <sup>(ph)</sup> <sup>#</sup> PEGSYTDANQEV | 15.39                            | 5.75                         | 4                   | 2.67                      |
| <b>Scaffolding protein</b>       |                                                |                                                |                                                                                                                                                      |                                  |                              |                     |                           |
| MTSS1                            | S275-p/<br>S276-p                              | S271/<br>S272-p                                | S <sup>(ph)</sup> <sup>#</sup> S <sup>(ph)</sup> <sup>#</sup> VCSSLNSVNSSDSR                                                                         | 5.41                             | 0.77                         | 6                   | 7.04                      |
|                                  | S279-p                                         | S275-p                                         | SSVCS <sup>(ph)</sup> SLNSVNSSDSR                                                                                                                    | 10.86                            | 0.77                         | 6                   | 14.12                     |
| PDLIM5 (ENH)                     | T110 /<br>S111-p                               | T110-p /<br>S111-p                             | EVVKVPVITS <sup>(ph)</sup> PAVSK                                                                                                                     | 13.38                            | 5.56                         | 4                   | 2.41                      |
| WIPF1                            | S330-p                                         | S340-p                                         | NLS <sup>(ph)</sup> LTSSAPPLPSPGR                                                                                                                    | 1.66                             | 0.60                         | 20                  | 2.77                      |
| <b>Adherens junction protein</b> |                                                |                                                |                                                                                                                                                      |                                  |                              |                     |                           |
| PTPN6 (SHP-2)                    | S534-p/<br>Y536-p                              | S534-p/<br>Y536-p                              | GQES <sup>(ph)</sup> <sup>#</sup> EY <sup>(ph)</sup> <sup>#</sup> GNITYPPAVR                                                                         | 9.95                             | 3.55                         | 5                   | 2.80                      |
| RAVER1                           | S524/<br>S525-p                                | gap                                            | IPLNPYLNHSLLLPS <sup>(ph)</sup> <sup>#</sup> S <sup>(ph)</sup> <sup>#</sup> NLAGK                                                                    | 21.16                            | 1.32                         | 9                   | 16.03                     |
|                                  | S637-p/<br>S641-p                              | gap                                            | S <sup>(ph)</sup> <sup>#</sup> GGS <sup>(ph)</sup> <sup>#</sup> GGPLSHFYSGSPTS <sup>(ph)</sup> YFTSGLQAGLK                                           | 6.87                             | 1.32                         | 9                   | 5.20                      |
|                                  | S696                                           | S531-p                                         | AVGSSPMGSSEGLLGLGPGNGHS <sup>(ph)</sup> HLLK                                                                                                         | 9.36                             | 1.32                         | 9                   | 7.11                      |
|                                  | S709/ S711                                     | gap                                            | RS <sup>(ph)</sup> <sup>#</sup> FS <sup>(ph)</sup> <sup>#</sup> HLLPSPEPSPEGSYVGGHSQGLGGHYADSYLK                                                     | 8.05                             | 1.32                         | 9                   | 6.12                      |
| <b>DNA/RNA-binding protein</b>   |                                                |                                                |                                                                                                                                                      |                                  |                              |                     |                           |
| AHNAK                            | S217-p                                         | S216-p                                         | LPSGSGPAS <sup>(ph)</sup> PTTGSVAVDIR                                                                                                                | 3.24                             | 1.50                         | 7                   | 2.16                      |
| EIF1                             | S2-p                                           | S2-p                                           | (ac)S <sup>(ph)</sup> AIQNLHSFDPFADASK                                                                                                               | 5.77                             | 0.86                         | 12                  | 6.71                      |
| SF1                              | S14                                            | S14-p                                          | (ac)ATGANATPLDFPS <sup>(ph)</sup> K                                                                                                                  | 9.79                             | 1.29                         | 14                  | 7.57                      |
|                                  | S272                                           | S272                                           | S <sup>(ph)</sup> ITNTTVCTK                                                                                                                          | 9.10                             | 1.29                         | 14                  | 7.03                      |
| UBAP2                            | S1018-p                                        | S1004-p                                        | GVS <sup>(ph)</sup> VSSGTGLPDMTGSVYNK                                                                                                                | 10.14                            | 2.58                         | 6                   | 3.93                      |
| UBAP2L                           | S629-p                                         | S609-p                                         | RYPSSISSS <sup>(ph)</sup> PQK                                                                                                                        | 6.49                             | 2.54                         | 15                  | 2.55                      |

|             |                 |                   |                                |      |      |    |      |
|-------------|-----------------|-------------------|--------------------------------|------|------|----|------|
|             | S872-p/<br>S875 | S852-p/<br>S855-p | DGS(ph) #LAS(ph) #NPYSGDLTK    | 9.64 | 2.54 | 15 | 3.79 |
| <b>ZBP1</b> | T356-p          | T371              | GEVMESGDSEEPKKEDTGTSEAT(ph)PPR | 7.72 | 1.96 | 7  | 3.95 |
|             | S384-p          | S405              | AMALGDSS(ph)PQTTEPVLR          | 5.04 | 1.96 | 7  | 2.57 |

**Supplementary Table 2: Phosphorylated peptides identified with KISS.** Identified peptides were subjected to cutoffs of mass spectrometry identification score of 44, protein ratio count of 4 and peptide/protein ratio of 2. All cysteines are carbamidomethylated. (ac) denotes acetylation and (ph) denotes phosphorylation. # denotes ambiguous identification in MS due to close proximity of serine/threonine pair.



| EVL                 |           | VASP                |            | CAP1                |        | SHOT1               |            | DIAPH1              |        |
|---------------------|-----------|---------------------|------------|---------------------|--------|---------------------|------------|---------------------|--------|
| Position in protein |           | Position in protein |            | Position in protein |        | Position in protein |            | Position in protein |        |
| Mouse#              | Human     | Mouse#              | Human      | Mouse               | Human# | Mouse#              | Human      | Mouse               | Human# |
| T19/S20             | T19/S20   | S2                  | S2         | S22                 | S22    | T14                 | T14        | S844                | S861   |
| S64                 | S64       | T4                  | T4         | S48                 | S49    | S101                | S101       | S942                | S959   |
| S243                | S245      | S8                  | S8         | S90                 | S91    | P124/A125           | S124/T125/ | T1213               | T1230  |
| S249                | S251      | S9                  | S9         | S254                | S255   | /T126/T128          | T126/T128  | S1214               | S1231  |
| S251                | S253      | S34                 | S34        | S265                | S266   | S191                | S191       | S1218               | S1235  |
| S257                | S259      | S46                 | S46        | S337                | S338   | S249                | S249       | T1242               | T1259  |
| S294                | S296      | P145                | S149       |                     |        | S255                | S255       |                     |        |
| S300                | S302      | S241                | S245       |                     |        | S256                | S256       |                     |        |
| S316/S317           | S318/S319 | S254                | S258       |                     |        | S351                | S351       |                     |        |
| S327                | S329      | S285                | S289       |                     |        | S375                | S375       |                     |        |
| S335                | S337      | S298                | S303       |                     |        | S467                | S467       |                     |        |
| S356                | S358      | S300                | S305       |                     |        | S473                | S473       |                     |        |
| S360                | S362      | S309                | S314       |                     |        | S493                | S493       |                     |        |
|                     |           | T310                | S315       |                     |        | T496                | T496       |                     |        |
|                     |           | S317/S318           | S322/S323  |                     |        | S502                | S502       |                     |        |
|                     |           | /S319/S320          | /S324/S325 |                     |        | S504                | S504       |                     |        |
|                     |           |                     |            |                     |        | S506                | S506       |                     |        |
|                     |           |                     |            |                     |        | S512                | S512       |                     |        |
|                     |           |                     |            |                     |        | T551/N552           | T551/S552  |                     |        |
|                     |           |                     |            |                     |        | /P553               | /S553      |                     |        |
|                     |           |                     |            |                     |        | S561                | S561       |                     |        |
|                     |           |                     |            |                     |        | S586                | S586       |                     |        |
|                     |           |                     |            |                     |        | S619                | S619       |                     |        |

**Supplementary Table 3: Phosphorylated peptides identified by mass spectrometry analysis of *in vitro* phosphorylated YopO substrates.** Serines or threonines separated by “/” were too close in proximity to differentiate from the mass spectra to identify which site(s) was phosphorylated. Human EVL (Uniprot Q9UI08), VASP (Uniprot P50552) and SHOT1 (Uniprot A0MZ66) and mouse CAP1 (P40124) and DIAPH1 (Uniprot O08808) (residues 583–1255) were used. To facilitate comparison with the phosphorylation sites reported in the literature, corresponding residues in their mouse or human counterparts are shown alongside and denoted with a (#). Shown in grey are corresponding residues in mouse or human which are not conserved.

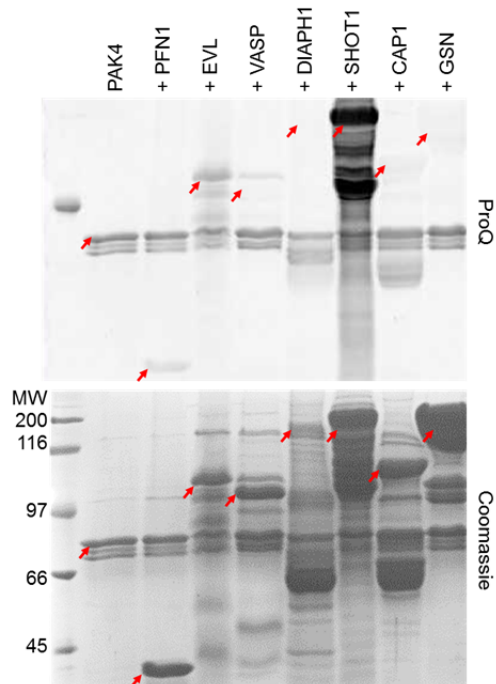

**Supplementary Figure 5: *In vitro* phosphorylation of actin-binding proteins by PAK4.**

The SDS-PAGE was imaged with ProQ Diamond phosphoprotein staining for phosphorylation followed by Coomassie staining for total protein. 3.8  $\mu\text{M}$  of PAK4 was incubated with 15.2  $\mu\text{M}$  of the respective substrates in 50 mM Hepes pH 7.5, 1 mM ATP, 50 mM KCl, 10 mM  $\text{MgCl}_2$  and 1 mM DTT at 30°C for 30 mins. PFN1, profilin; GSN, gelsolin.

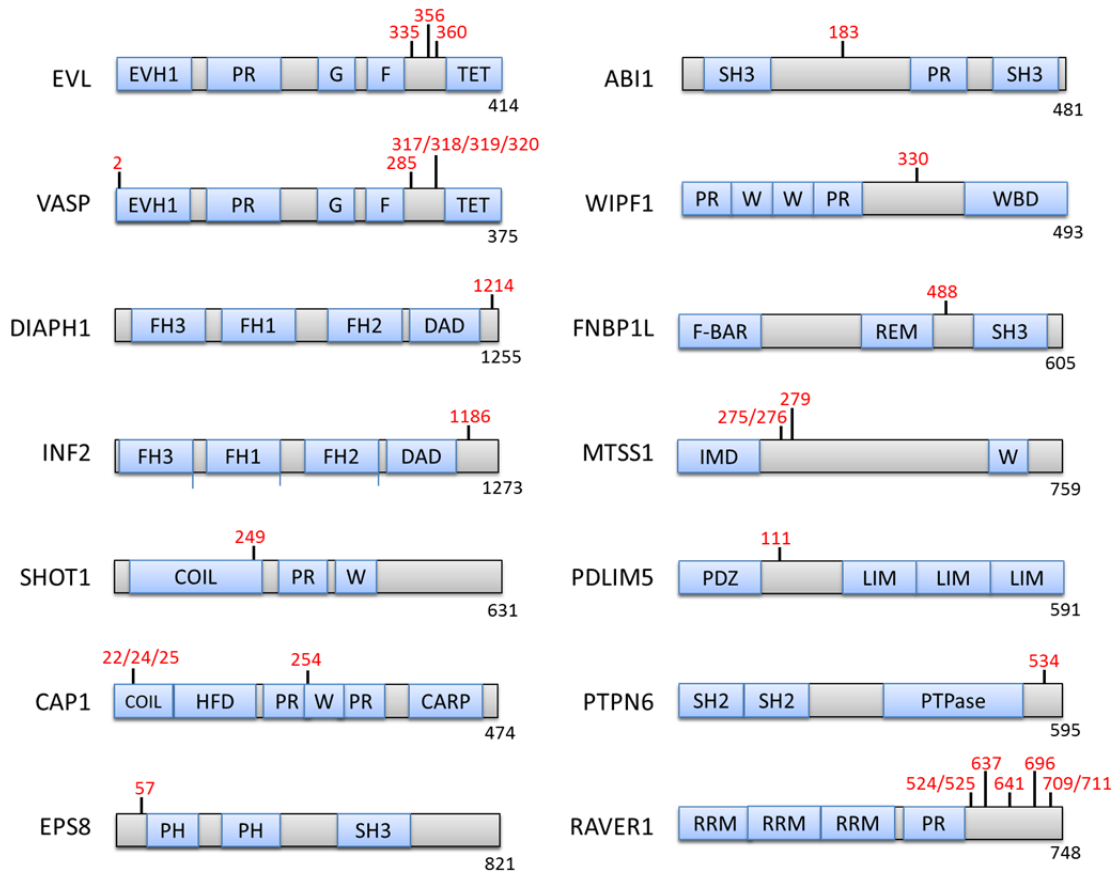

**Supplementary Figure 6: Domain organization showing position of validated YopO phosphorylation sites.** EVH1, enabled/VASP homology 1 domain; PR, poly-proline; G, G-actin binding domain; F, F-actin binding domain; Tet, tetramerization domain; FH1, 2, 3, formin homology domains 1, 2 and 3; DAD, diaphanous autoregulatory domain; COIL, coiled coil; ; W, Wiskott-Aldrich syndrome homology region 2 (WH2); HFD, helical folded domain; CARP,  $\beta$ -sheet/ $\beta$ -helix (CARP) domain; PH, Pleckstrin homology; SH2 and 3, src homology-2 and 3; WBD, WASP-binding domain; REM, Ras exchanger motif; IMD, IRSp53 and MIM homology domain; PTPase, protein tyrosine phosphatase.

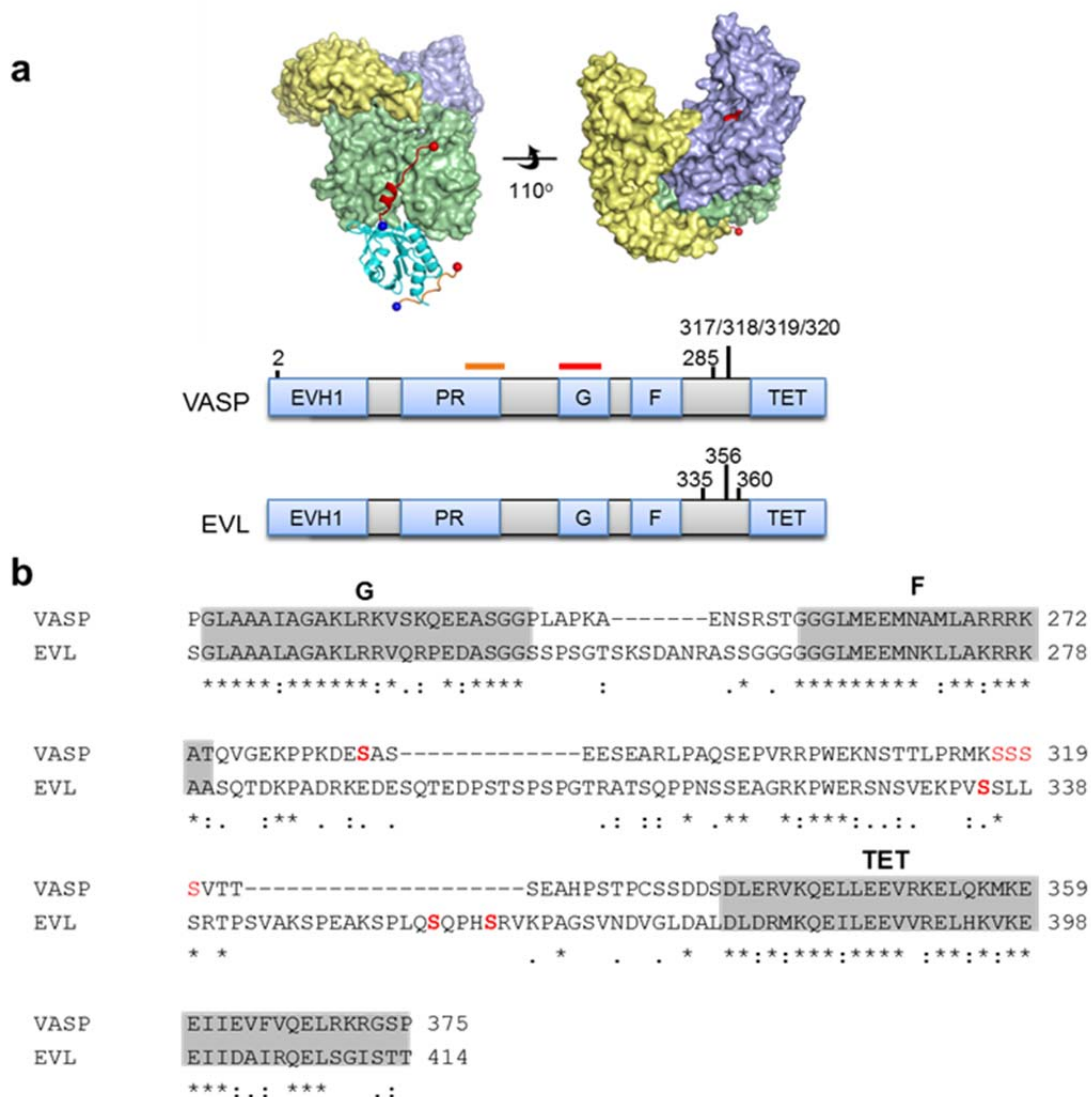

**Supplementary Figure 7. Model of binding of EVL and VASP to YopO:actin for phosphorylation.** Model of the quaternary complex of YopO–actin–profilin–VASP fragment derived from PDB code 2PBD, in which the poly-proline sequence is shown in orange and the G-actin binding domain is in red. The N- and C-termini are shown as blue and red spheres respectively. The model illustrates how the binding of VASP to YopO:actin may allow the region C-terminal of the G-actin binding domain to span into the catalytic cleft for phosphorylation. The similar domain structures of EVL and VASP suggest that they may share a similar mode of binding, though this does not explain the phosphorylation observed on Ser2 of VASP. Mouse orthologs are shown here with the KISS phosphorylation sites shown in bold red. Residues shown in red but not in bold are ambiguously identified and either one of the four serines could be phosphorylated. G, G-actin binding domain; F, F-actin binding domain; Tet, tetramerization domain.

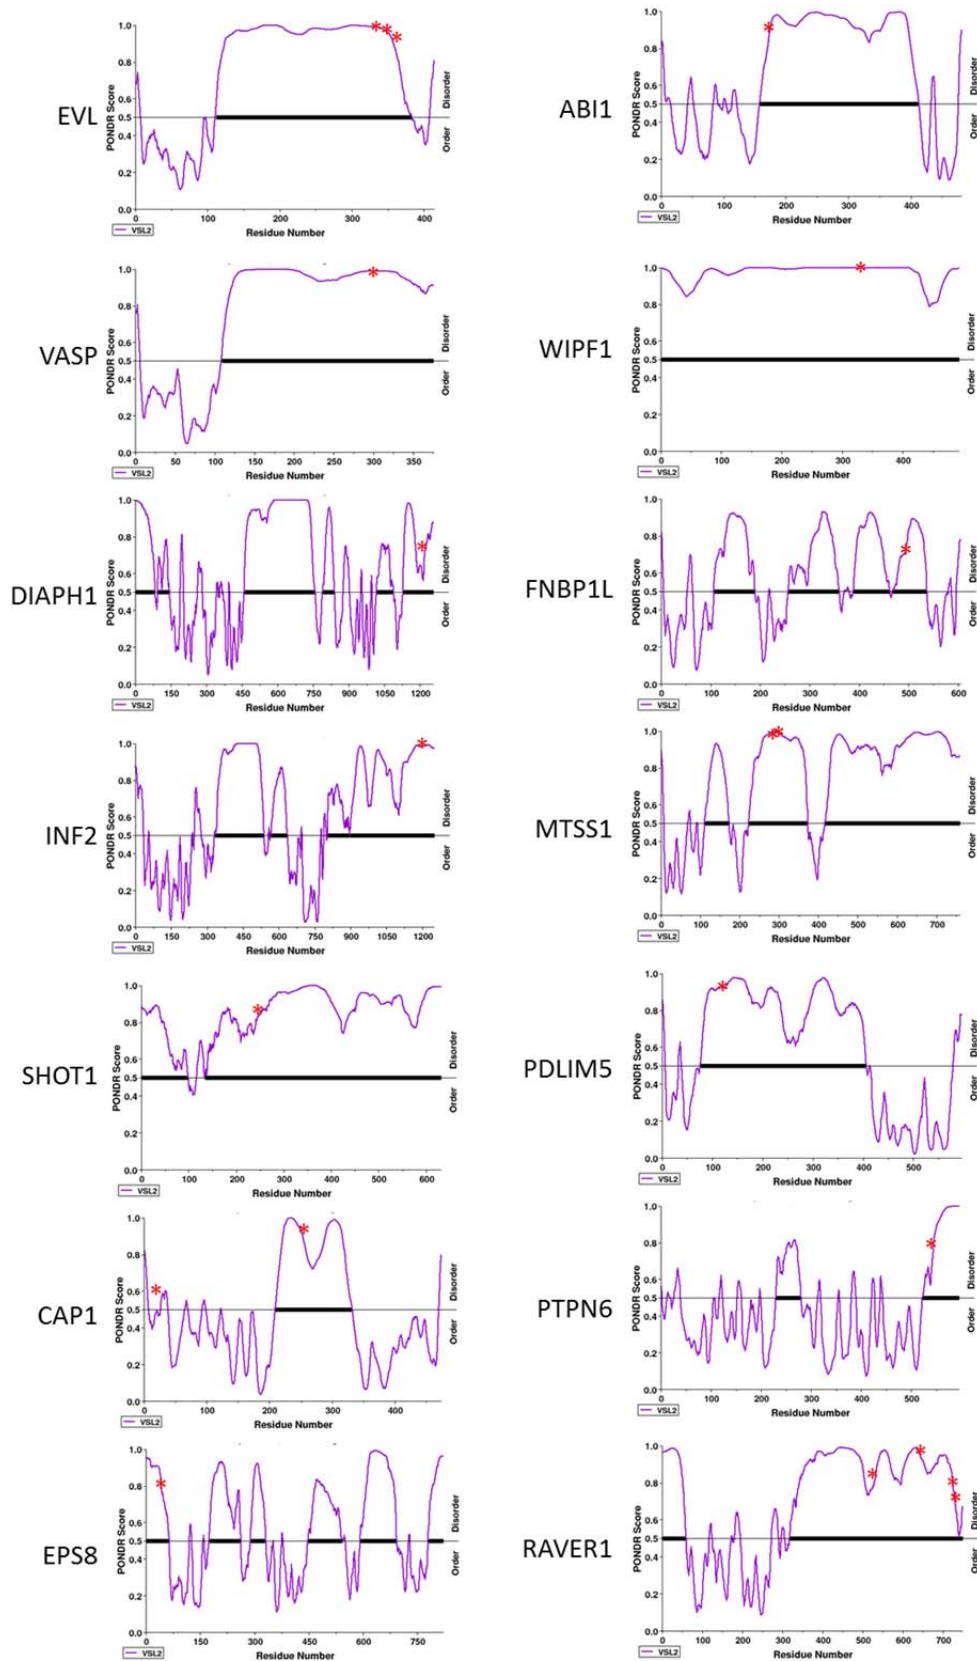

**Supplementary Figure 8: Prediction of disordered regions on YopO substrates using PONDR.** The prediction was performed on mouse orthologs using the VSL2 predictor algorithm. Residues phosphorylated by YopO are indicated by red asterisks.

|                       | <i>In vitro</i> phosphorylation sites                                                                                                                                                                                                                                                                                                                                                             | KISS sites                                                                           |
|-----------------------|---------------------------------------------------------------------------------------------------------------------------------------------------------------------------------------------------------------------------------------------------------------------------------------------------------------------------------------------------------------------------------------------------|--------------------------------------------------------------------------------------|
| <b>EVL</b>            | QQVVI NYSI VKGLKY<br>PEDASGGSSPSGTSK<br>GSSPSGTSKSDANRA<br>SPSGTSKSDANRASS<br>KSDANRASGGGGGGL<br>AEKKEDESQMEDPST<br>ESQMEDPSTSPSPGT<br>GRKPWERSNSVEKPV<br>NSVEKPVSSI LSRTP<br>EAKSPLOSQPHSRMK<br>PLOSQPHSRMKPAGS                                                                                                                                                                                  | NSVEKPVSSLLSRTP<br>EAKSPLOSQPHSRVK<br>PLOSQPHSRVKPAGS                                |
| <b>VASP</b>           | GTGPOAFSRVQI YHN<br>YHNPTANSFRVFRV<br>KROQPGPSEHI ERRV<br>VSKQEEAAGGPTAPK<br>PKAESGRSGGGGLME<br>EKTPKDESANQEEPE<br>EARVPAQSESVRRPW<br>RVPAQSESVRRPWK<br>RRPWKNSTTLPRMK<br>RPWEKNSTTLPRMKS                                                                                                                                                                                                         | MSETVI CSS<br>EKPPKDESASEESEA                                                        |
| <b>DIAPH1</b>         | SKTAQNLSI FLGSFR<br>NI KPEI VSVTAACEE<br>RKAGCAVTSLLASEL<br>KAGCAVTSLLASELT<br>AVTSLLASELTKDDA<br>KKSEGVPTI LEEAKE                                                                                                                                                                                                                                                                                | KAGCAVTSLLASELT                                                                      |
| <b>INF2</b>           | N. D.                                                                                                                                                                                                                                                                                                                                                                                             | DEAORGQSTHLPRTG                                                                      |
| <b>SHOT1</b>          | EKQLQLI TSLKEOAI<br>NKTLKRI SMLYMAKL<br>OEKTVLNSEVLEORK<br>QNKLKROSHLLLQSS<br>QSHLLLQSSI PDQQL<br>SHLLLQSSI PDQQLL<br>RVNQSENSVPPPPPP<br>NPI RSLMSMI RKRSH<br>TSSRSLKSLDPENSE<br>KSLDPENSE TELERI<br>VTAEADSSSPTGI LA<br>EADSSSPTGI LATSE<br>PTGI LATSEKSMPLV<br>GI LATSEKSMPLV<br>LATSEKSMPLVLSV<br>KSMPLVLSVSSVTKT<br>KLEGCTSSKVTFFPP<br>KVTFQPPSSI GCRKK<br>VVLDPVSTHEPOTK<br>OPENKEDSI ENVRET | QNKLKROSHLLLQSS                                                                      |
| <b>CAP1</b>           | PYVQAFDSSLANPVA<br>RALLATASQCQPAG<br>SDDSASRSALFAQI N<br>AQI NQGESI THALKH<br>VENQENVSNLVI DDT                                                                                                                                                                                                                                                                                                    | SDDSASRSALFAQI N                                                                     |
| <b>EPS8</b>           | N. D.                                                                                                                                                                                                                                                                                                                                                                                             | NYARDSVSSVSDVSQ                                                                      |
| <b>ABI1</b>           | N. D.                                                                                                                                                                                                                                                                                                                                                                                             | PPTQKPPSPVSGRG                                                                       |
| <b>FBNP1L</b>         | N. D.                                                                                                                                                                                                                                                                                                                                                                                             | IRGDRRHSSDI NHLV                                                                     |
| <b>MTSS1</b>          | N. D.                                                                                                                                                                                                                                                                                                                                                                                             | SRKSSVCSSLNSVNS                                                                      |
| <b>PDLIM5</b>         | N. D.                                                                                                                                                                                                                                                                                                                                                                                             | VKPVPI TSPAVSKVT                                                                     |
| <b>CTNND1</b>         | N. D.                                                                                                                                                                                                                                                                                                                                                                                             | DPRRRLRSYEDMI GE                                                                     |
| <b>PTPN6</b>          | N. D.                                                                                                                                                                                                                                                                                                                                                                                             | N. A.                                                                                |
| <b>Sequence logo</b>  |                                                                                                                                                                                                                                                                                                                |  |
| <b>Frequency plot</b> |                                                                                                                                                                                                                                                                                                                |  |

**Supplementary Figure 9: Analysis of substrate phosphorylation sequence determinants.**

Phosphorylation sites including 7 residues up and downstream of the phosphoacceptor as identified by *in vitro* and KISS phosphorylation were used in the sequence analysis. Ambiguously determined phosphorylation sites were left out from this table and not included in logo generation. *In vitro phosphorylation* was performed using human EVL, VASP, SHOT1 and mouse CAP1 and DIAPH1 and sequences shown are of their respective orthologs. KISS was performed on mouse macrophage-like cell line Raw264.7 and consequently shown sequences were from mouse. The phosphorylated residue is positioned at 0, while positive and negative positions represent amino acids on the COOH- and NH<sub>2</sub>-terminal side of the phosphorylated residue respectively. These plots are generated by WebLogo<sup>2</sup>. N.D., not determined. N.A., not applicable, due to ambiguous identification.

| Constructs    | Amino acid sequences                                                                                                                                                                                           | No. of residues between FKHV and phosphoacceptor serine |
|---------------|----------------------------------------------------------------------------------------------------------------------------------------------------------------------------------------------------------------|---------------------------------------------------------|
| G1-ΔDIAPH1    | GPGRPMVVEHPEFLKAGKEPGLQIWRVEKFDLVPVPTNLYGDFFTGDAYVILKTVQLRNGNLQYDLHYWLGNECSQDESGAAAIFTVQLDDYLNGRAVQHREVQGFESATFLGYFKSGLKYKKGAVASG <b>FKHV</b> VPNEVVVQRLKAGCAVTSLLASELT                                        | 17                                                      |
| G1-15-ΔDIAPH1 | GPGRPMVVEHPEFLKAGKEPGLQIWRVEKFDLVPVPTNLYGDFFTGDAYVILKTVQLRNGNLQYDLHYWLGNECSQDESGAAAIFTVQLDDYLNGRAVQHREVQGFESATFLGYFKSGLKYKKGAVASG <b>FKHV</b> VPNEVVVQRLGGAGAGAGGAAGGAGKAGCAVTSLLASELT                         | 32                                                      |
| G1-22-ΔDIAPH1 | GPGRPMVVEHPEFLKAGKEPGLQIWRVEKFDLVPVPTNLYGDFFTGDAYVILKTVQLRNGNLQYDLHYWLGNECSQDESGAAAIFTVQLDDYLNGRAVQHREVQGFESATFLGYFKSGLKYKKGAVASG <b>FKHV</b> VPNEVVVQRLGGAGAGAGGAGAGAGGAAGGAGKAGCAVTSLLASELT                  | 39                                                      |
| G1-30-ΔDIAPH1 | GPGRPMVVEHPEFLKAGKEPGLQIWRVEKFDLVPVPTNLYGDFFTGDAYVILKTVQLRNGNLQYDLHYWLGNECSQDESGAAAIFTVQLDDYLNGRAVQHREVQGFESATFLGYFKSGLKYKKGAVASG <b>FKHV</b> VPNEVVVQRLGGAGAGAGGAAGGAGGGAGAGAGGAGAGGAGGAGKAGCAVTSLLASELT      | 47                                                      |
| G1-36-ΔDIAPH1 | GPGRPMVVEHPEFLKAGKEPGLQIWRVEKFDLVPVPTNLYGDFFTGDAYVILKTVQLRNGNLQYDLHYWLGNECSQDESGAAAIFTVQLDDYLNGRAVQHREVQGFESATFLGYFKSGLKYKKGAVASG <b>FKHV</b> VPNEVVVQRLGGAGAGAGGAAGGAGGGAGAGGGAGAGGGAGAGGAGGAGKAGCAVTSLLASELT | 53                                                      |
| G1-15-PKCa    | GPGRPMVVEHPEFLKAGKEPGLQIWRVEKFDLVPVPTNLYGDFFTGDAYVILKTVQLRNGNLQYDLHYWLGNECSQDESGAAAIFTVQLDDYLNGRAVQHREVQGFESATFLGYFKSGLKYKKGAVASG <b>FKHV</b> VPNEVVVQRLGGAGAGAGGAAGGAGKRRRRRKGSKKSELT                         | 32                                                      |
| G1-15-PKA     | GPGRPMVVEHPEFLKAGKEPGLQIWRVEKFDLVPVPTNLYGDFFTGDAYVILKTVQLRNGNLQYDLHYWLGNECSQDESGAAAIFTVQLDDYLNGRAVQHREVQGFESATFLGYFKSGLKYKKGAVASG <b>FKHV</b> VPNEVVVQRLGGAGAGAGGAAGGAGKAGKKRFSIFDEL                           | 32                                                      |
| G1-15-PAK     | GPGRPMVVEHPEFLKAGKEPGLQIWRVEKFDLVPVPTNLYGDFFTGDAYVILKTVQLRNGNLQYDLHYWLGNECSQDESGAAAIFTVQLDDYLNGRAVQHREVQGFESATFLGYFKSGLKYKKGAVASG <b>FKHV</b> VPNEVVVQRLGGAGAGAGGAAGGAGKAGCKRTSLLASELT                         | 32                                                      |
| G1-15-CK2     | GPGRPMVVEHPEFLKAGKEPGLQIWRVEKFDLVPVPTNLYGDFFTGDAYVILKTVQLRNGNLQYDLHYWLGNECSQDESGAAAIFTVQLDDYLNGRAVQHREVQGFESATFLGYFKSGLKYKKGAVASG <b>FKHV</b> VPNEVVVQRLGGAGAGAGGAAGGAGKAGCAVTSLLDDEL                          | 32                                                      |
| G1-15-Poly-G  | GPGRPMVVEHPEFLKAGKEPGLQIWRVEKFDLVPVPTNLYGDFFTGDAYVILKTVQLRNGNLQYDLHYWLGNECSQDESGAAAIFTVQLDDYLNGRAVQHREVQGFESATFLGYFKSGLKYKKGAVASG <b>FKHV</b> VPNEVVVQRLGGAGAGAGGAAGGAGKGGGGGGSGGGGGT                          | 32                                                      |

**Supplementary Table 4. Protein sequences of the artificial substrates.** The residues GPGRP are left after 3C protease cleavage. The FKHV motif, shown in bold, is the gelsolin equivalent of the LKKT motif in WH2 domains<sup>3</sup>. The poly-glycine-alanine linker is shown in red.

## References

- 1 Pei, J. & Grishin, N. V. PROMALS: towards accurate multiple sequence alignments of distantly related proteins. *Bioinformatics* **23**, 802-808 (2007).
- 2 Crooks, G. E., Hon, G., Chandonia, J.-M. & Brenner, S. E. WebLogo: A Sequence Logo Generator. *Genome Res* **14**, 1188-1190 (2004).
- 3 Irobi, E. *et al.* Structural basis of actin sequestration by thymosin-β4: implications for WH2 proteins. *Embo J* **23**, 3599 (2004).
